# Supplementary material for: Salidroside alleviates cholestasis-induced liver fibrosis by inhibiting hepatic stellate cells via activation of the PI3K/AKT/GSK-3β signaling pathway and regulating intestinal flora distribution
Source: Front Pharmacol. 2024 May 14;15:1396023. doi: 10.3389/fphar.2024.1396023 (PMC11130389; doi:10.3389/fphar.2024.1396023)
Supplement: Supplementary file 2 [file DataSheet3.xlsx]

## Sheet: Sheet1
gene name
TGFB1
ABCB4
POU2AF1
RAD51B
CAV2
DLAT
TIMMDC1
CFTR
SLCO1C1
HHIP
FBXL20
WDR35
EIF4E
ICAM3
ABCC2
CXCL10
SPIB
IL12A-AS1
ABCG2
GHRL
ABCC4
CXCL9
AQP4
DCTN4
NAB1
TGFBR2
MAPK14
ESR1
HMOX1
PDE5A
DBT
IL12RB2
STAT3
MMP2
ENTPD2
CXCR5
TNFSF15
IKZF3
CCN2
CAV1
FN1
DENND1B
CD80
IDO1
JAK2
ATM
MAP3K14
MMP13
PPARG
HLA-DRB1
IL7R
ALPP
ALB
LOX
MMP3
CD3D
ITGAL
UBD
CD27
BMI1
CDH5
PTPN22
NFKB1
CYGB
PLCL2
TLR4
TNFSF10
DCDC2
GOT1
LOXL2
REN
IL4
SLC51B
IGFBP1
KRT7
RPS6KB1
PPARGC1A
NOS3
TFF3
CXCR3
CLEC16A
ACE2
CPEB1
ELF1
GSTP1
NOS2
STX1A
GNLY
MMEL1
LBR
COL1A1
CTLA4
LEP
MAS1
SLC4A2
STAT4
TNFRSF1A
EDN1
CLCA4
SLC51A
DAG1
TRPV1
LINC01100
TNPO3
NSA2
CCL5
PDHX
ICAM1
TYK2
FCGR2A
IRF5
RPS6KA4
ACE
HAMP
TSBP1
TSBP1-AS1
KEAP1
NFE2L2
NPHP3
IL12A
AGT
VEGFA
IL12RB1
SERPINA1
NUP210
ELMO1
HGF
RELA
CDKN1A
IL12B
HIF1A
MMP9
UTP4
ABCB11
KRT18
MIR122
ATP8B1
KRT8
PBC2
PBC3
PBC4
PBC5
MIR17
NR1H4
MIR451A
MIR212
MIR150
MIR223
F2
MIRLET7B
MIR483
MIR20A
MIR30D
MIR324
MIR197
MIR296
MIR361
GPT
MIR328
MIR494
MIR326
MIR133B
TNF
MIR299
MIR519D
HSD3B7
MIR346
ENSG00000266919
MEG3
GGT1
SLC17A5
HULC
IL6
PNPLA3
AFP
BMP6
INS
YARS1
VDR
ATP7B
MYO5B
MIR21
ATP8B1-AS1
IL10
TP53
IL1B
TERT
USP53
MIR7-3HG
FAH
NR1I2
CXCL8
TJP2
ABCC3
BMP2
TIMP1
CD40LG
CYP7B1
BGLAP
IFNL3
SLC10A1
CYP3A4
CYP7A1
CCL2
H19
AKR1D1
SLCO1B1
SST
DGUOK
LIPA
MIR142
AXIN1
MET
FGF19
CTNNB1
SLC25A13
MIR34A
ADIPOQ
CP
CALR
SCT
SOD2
IL17A
F3
SLC10A2
TCF4
MBL2
APOE
LCAT
IFNA1
APOB
IFNG
IL2
SEPSECS
EPCAM
IGF1
CRP
TF
MIR199A1
KIF12
VPS33B
AGL
CD58
SKIC2
SP100
OGDH
NR1I3
HLA-B
KRT19
SERPINC1
AKT1
HLA-DQA1
CCDC115
SKIC3
CALCA
HRAS
PPARA
FOXP3
VIPAS39
CASP8
MST1
TFAM
NR0B2
CD79A
ABCB7
MIR222
IGFBP3
ENPP2
SEMA4D
GPR35
F5
AMACR
MIR30A
MKI67
SUN2
ZFYVE19
JAG1
CD4
CYP1A2
TTR
TLR3
RBP4
BCL2
CCR6
PVT1
PDP1
IL1A
MIRLET7D
GLUL
DPP4
SERPINA3
DHCR7
MAPK1
LEPR
CETP
HLA-A
SP140
MIR191
PRTN3
RXRA
KRAS
PSC
NOTCH2
MADCAM1
ENG
PDCD1
XIST
PKHD1
MIR139
AIRE
TLR9
CCR5
HOTTIP
CD8A
ENO1
CYP27A1
MIR26B
CYP8B1
GPBAR1
LTA
ALAS2
MIR155
MTUS1
TM6SF2
FECH
SLCO1B3
ABCG5
CIITA
PML
GBA1
KCNQ1OT1
CA2
MIR141
LGALS3BP
THPO
MPI
GZMB
SNHG1
LCS1
HLA-DQB1
FGFR4
DLD
MCL1
SERPINE1
PNKD
AVP
MAT1A
CES2
NPC1
HSPD1
DANCR
MIR29A
IFNA2
SELL
IL2RB
AR
H2AC18
CENPB
MIR378A
MIR100HG
ABCG8
MIR148A
EDNRA
DMBT1
IDH1
MTTP
HEIH
SNHG6
DNASE2
AGK
APOA1
EGF
MIRLET7A1
ICOSLG
MIRLET7A2
MIRLET7A3
CD1D
NR1H2
VWF
VCP
LIVAR
NOD2
ABCB1
TNFRSF10A
CASC15
MPO
CST3
MIR22HG
PCAT1
IL18
TULP3
SHBG
TNFRSF25
NFKBIA
DNAL1
KLB
TLR2
IL1RN
CYP2D6
HNF4A
VCAM1
TFRC
AGTR1
HMGCR
LGALS3
SOCS1
PCNA
SSB
HADHA
PON1
TRIM21
RNPC3
PDHA1
IGF2
ACTA1
CERNA3
SOD1
BAAT
HLA-C
TGFA
TWNK
MIR513A1
GHR
SPP1
CDH1
FASLG
ABCC1
NEUROG3
SLPI
FAS
PRF1
ALG1
BPI
PLAT
MMP7
ABCA1
SLCO1A2
CCR2
ELANE
ATP6AP1
HNF1B
CLCN1
SQSTM1
SLC9A3
ERCC1
TIMP2
MME
LINC02605
SELP
KDR
AREG
MAPK3
LAP3
CD14
STXBP2
SMAD3
RPE65
PTGS2
IFNB1
PGR-AS1
CYP2C19
ATP11C
CCL4
THBD
SELE
MUC16
LEPQTL1
CHUK
EDN3
LINC01672
SREBF2
SCARB1
NPC2
MT-ATP6
CTSG
TMEM30A
CLDN1
CEACAM5
MT-ND5
LPL
MIR493HG
ENSG00000276919
NPHP4
CASP3
XDH
ALG2
SOD2-OT1
MYC
CCK
RDX
CYP51A1
SPINT2
FBN1
EPAS1
MBOAT7
BLVRA
LTF
HADHB
UGT1A1
ATP11A
PLAU
CNR1
ANPEP
PRL
SP1
ATP8B2
AQP1
NGF
HMGCL
POMC
GH1
GSR
SNHG22
SULT2A1
LOC106627981
F2R
CDAN1
LOC111674472
PTCH1
CYP2C9
RHOA
PCSK9
GLIS3
ITGAV
CLU
MAPK8
UGT3A1
RIGI
LDLR
ITGB2
AOC3
HNF1A
ITGB1
CCL27
HSPB1
AXIN2
ADPRH
SLC27A5
GPX1
SIRT1
IL2RA
MED12
REG1A
STX3
TTC7A
E2F1
MCCC2
FBXL4
THBS1
CCL3
SERPINA7
SCTR
LPA
RAC1
PPIG
CHKA
TMEM199
EGR1
BCHE
ITGAM
HSD11B2
FDFT1
MIR542
TNFRSF10B
RHOD
SHH
GNMT
CASP9
PIK3CG
UGT1A9
HSD3B1
CYP17A1
TMX2-CTNND1
FABP6
CEL
CYP19A1
FOXO1
MIR506
EZR
ETS1
MIR499A
CCR4
MT-TP
SLC6A4
ATP8B3
CCL15-CCL14
MIR124-1
PRKCA
ANXA2
PLK1
HDAC2
ANXA5
KLF6
HGFAC
IL21
SOST
GFER
SLC22A1
PRDX4
CRH
RNU6-1
RNU6-2
RNU6-7
RNU6-8
RNU6-9
RNU6-1-001
RNU6-1-002
RNU6-1-003
RNU6-1-004
SCP2
CTTN
HDAC9
SRC
XIAP
COG2
MT-ND1
MIRLET7I
CPT1A
ACKR2
MMP14
CES1
CCN1
SAA1
RARA
SMAD5-AS1
HMGA1
LIPC
TPMT
NISCH
CYP39A1
CD40
BLVRB
COL1A2
MT-ND2
ZNF697
AXL
PWAR1
CHGA
FADS1
VIL1
APP
ELAVL1
ENSG00000232995
S100A9
PARP1
FHL2
SOX9
CXCL2
SCAP
ENSG00000276609
ENSG00000277469
ENSG00000277553
ENSG00000278708
SYP
BDNF-AS
CYP3A5
EDN2
PHB2
CFP
BIRC3
CYCS
RF03470-004
SQLE
ALG6
MLN
ATP8A1
ATP8A2
TMEM30B
TXN2
HTR3A
CREB1
IL22
YY1
MMP15
CLDN7
CHKB-CPT1B
THY1
CYP2B6
MIR130B
POGLUT1
LAMP2
ALG8
SLC35C1
ITGA5
BIRC2
FOXA2
MAP1LC3A
MAFG
CPQ
PIK3R1
VHL
ALPL
SNORD44
FUT2
CCR9
CCL25
PEX26
ACVR1
GALK1
ESR2
COL13A1
ACP5
EXOSC2
EXOSC4
TRC-GCA24-1
BDNF
MIR505
NR3C1
NADSYN1
ALG9
ITGB6
SLC5A1
UGT2B7
CGB3
NFKB2
CABIN1
F10
DMD
MTREX
HSPG2
LACTB
IL1RAPL2
TXNRD1
VEGFC
CYBA
NLRP3
CGA
NR3C2
EXOSC5
IL11
HES1
ALG3
ATP11B
ATP9A
FICD
TMEM30CP
APEH
EXOSC3
CFLAR
MANBA
KLK3
MAPK9
ADAMTS2
CCBE1
SOX18
DUS3L
FAM43A
FAM104B
BCL2L10
CTF1
GUCY2C
SLC26A3
PRPF4
EXOSC7
DIS3L
RBM7
RP9
ZCCHC8
SKIC8
EXOSC6
HSPA8
TARDBP
MAP1LC3B
MECP2
PIK3C2A
LTB
LINC01191
ADD3
LSM2
TJP1
FLT4
EHHADH
MIR100
MIR7-1
NPHS1
PTHLH
TERF1
AKR1C4
GPR183
GLI2
OPRK1
MSLN
EXOSC9
PRPF3
PRPF31
DIS3
SNRNP200
EXOSC8
PRPF6
TAF6
EXOSC1
SASH1
ARID4A
PQBP1
TSEN34
DENND4A
DRAP1
FOXE3
CPEB2
ZCCHC7
ZNF628
ZNF396
KITLG
GATM
INSIG1
ATP6V0A2
ALG13
OLR1
SLX1A-SULT1A3
LINC01618
AMH
BMP15
NCAM1
PSG2
COLCA1
COMT
FIBP
CXCL16
DEFB1
LOC285626
LOC105377683
HADH
STS
CFL1
ABCC6
HRH2
LINC01193
OR4M2-OT1
LINC02203
ENSG00000284500
TPO
RFX6
UGT1A
PGLYRP2
LOC101927687
C4BPA
OR2M3
NDST4
HCCAT5
NDST3
LIPK
TTTY17A
LOC101929633
FLJ33534
RBP3
LINC00520
PADI1
LOC101927227
CELA3B
FAXDC2
ABCB5
HPN
GATA6
SNORD115-32
LYPD1
LYPD8
FAM221A
GHRHR
ADAMTS17
SYNDIG1
C19ORF33
RSU1
HCRT
LINC00313
GLYATL3
CFAP74
CADM3
GPR15
CADM4
ABCA3
FGF13-AS1
OR2J3
OR4N4
NBPF22P
AIF1L
FXYD3
LOC100128276
LINC00303
NOX3
NOX5
NANOG
PHKA2-AS1
LINC00544
SNAR-I
LRRC39
LRRC4
BHLHE41
LOC283683
SHB
LOC101928576
GPRC6A
CHAF1B
FAM138E
MECOM
LEFTY1
FGFBP1
LOC101928105
CCDC162P
C20ORF173
LRRD1
TEX19
SH3RF3-AS1
MIR3663HG
PIGK
NUP62CL
GPRC5D
VN1R5
GOT1L1
EMX2OS
LOC284798
IFNG-AS1
NBPF25P
FOXS1
PROKR2
EXTL1
PRR14L
BPIFA4P
UCP2
AGR3
KRTAP2-3
KRTAP2-2
CSMD2
LEFTY2
LINC00511
LOC400748
ATAD5
ATRNL1
WNT7B
MBD2
VWA3A
ADAM30
VENTXP1
STXBP5L
CCDC7
OR10G7
SIGLEC8
SIGLEC7
CRB3
LINC00384
IFNA22P
RASL11B
LY75
MYLK3
FOXQ1
SLN
ROS1
LINC01467
CDKL2
SPAG11B
C11ORF87
OR14C36
ZBTB32
LOC101928385
STON1-GTF2A1L
MYT1
SRCIN1
CDC25A
LOC102723692
OR2T5
OLFM1
OR2T2
FRMD7
LOC100652768
KANK4
KANK3
OSBP2
IFNA10
LINC01252
CPB1
SHC3
LINC01013
FBXO43
LRRC52
OR51S1
TRIM49B
TNFRSF14
RAB9BP1
PRKAG2-AS1
HHATL
ODF3
NEK7
ZBTB10
TMPRSS12
MFHAS1
AAK1
TSPY26P
LINC01477
LOC100130587
PIWIL2
KCNK7
LRRK2
BMP7-AS1
MCM10
EFCAB11
LOC643339
NKPD1
LOC102724732
SPDYE2
PGM5
LINC00574
OR56B4
LINC00334
PIANP
TNFRSF18
LOC101927098
CCDC183-AS1
NRG2
OR10A7
MMS22L
DBF4
MYO3A
TM4SF1-AS1
SPACA7
SMIM24
PCOLCE2
PPM1N
SLC5A10
TSPAN33
NTN3
PTPRZ1
OR2W3
AWAT2
CCDC85A
LINC01206
BEND4
OR12D3
LINC01208
TRIM43
E2F7
E2F8
NTRK1
LINGO1
PPP1R14C
SPDYE4
DONSON
LOC102723430
SYT14
TBX4
MYO16
TSPAN16
TTTY18
DBNDD2
TTTY19
USH1G
LINC00589
EGFEM1P
LOC338963
TMEM41A
RGSL1
RFESD
LDLRAD4
CCDC102B
HERC5
AADACL3
BPIFA1
RASSF2
FOXD3-AS1
TRIM29
RESP18
MYCBP2-AS1
FBXO5
LGALS8
TMPO
C22ORF42
SYNPR-AS1
MYO7A
TM4SF1
CCAT1
SFRP2
CRISPLD1
ZNF717
LOC102724700
SMG6-IT1
SPATA13
ZNF711
ALPK3
MXRA5
NAIP
DEFB103B
EPB41
KALRN
PGBD3
ACTR3C
APELA
PCBP3
ARSJ
MIER1
SLAMF7
SLC10A4
RTBDN
OR51I2
LOC101926944
LRRN4
XRCC3
GREB1
PRG2
CELA1
OR51I1
HSPA12B
DCLK1
CRNN
PEX5L
CALY
CTRC
WFDC8
MSTN
CCDC127
PTGDR2
PTPRO
WFDC1
DOC2B
WFDC2
CTSS
EZR-AS1
LOC285191
HYAL1
CTSK
LOC100134040
SFTPB
CACTIN-AS1
SLC32A1
MMD
LINC00293
SEBOX
GAB3
ANO3
CNKSR2
RNF144A
MC3R
NCR3
LOC102724900
CCNI2
LOC100505685
PDZRN4
ITPKB-IT1
FOXC2
CCDC103
GNAI3
NEDD9
SLED1
GNA14-AS1
LINC01165
LINC01166
LINC01163
KLK13
CRYBB3
DEFB133
DSPP
BAALC-AS1
MAD2L2
NLRP12
XK
GRIK1-AS1
NOL4L
SGSM3
SMAD1-AS1
ESYT3
AUNIP
ALLC
IL18R1
OTC
OR7G3
LOC101928932
CELSR1
ACTG2
TGM1
NPPC
FAM174B
RAG2
TGM3
SPINK4
GEN1
ATG9B
OSR1
ACOT11
PRLR
LINC00927
CD8B
CCNE2
EEF1A2
GPD1
DOK7
EPHA5-AS1
WDFY4
CARD11
RTN1
KLHL14
NXPH3
CCDC148
UBA5
TCF7
CACNA1B
PLD1
RASGRP1
SYCE3
RAI1
GRK5
CHAD
OR51B5
CAMTA1
CCDC141
KRTAP12-4
CCDC136
BMP7
TMEM232
COL5A1
TAB2
FGF13
OR51A7
FGF10
RERE
MS4A5
RHOXF2
BRDTP1
HMGB2
ATP2A1
LDB2
TTC29
SIRPB1
PITPNC1
LOC101927881
GRM2
ACOXL
GRM7
RASGEF1B
GDAP1L1
DACT2
CA9
SCN5A
LOC647264
RBM34
BCKDHA
LOC101927414
MMP1
USP12-AS1
LOC101927418
PLA2G4E
ARHGEF19
CBR3-AS1
SUN5
C4ORF45
PSRC1
TEX13A
FAM153A
MMRN2
CHI3L2
CDHR4
ZP1
SCN4A
NAA38
DPPA5
DNAH7
DAPL1
LOC101927668
LAMA4
DBX1
SPATA42
KRT17P5
IL1RL1
GNG3
LOC653712
SPATA45
MARVELD3
CCDC181
CCDC183
S100B
SCIMP
BOK-AS1
MIR4500HG
OPN1SW
FAM131B
IPO13
DOC2GP
ZNF174
TMEM200C
STMN2
RAPH1
MRGPRD
SLCO6A1
ADARB2
LOC102724253
LINC01506
SCN11A
TEPP
LINC00652
CDK5RAP3
CHGB
NKX2-8
LOC101929756
TRIQK
DEPDC1-AS1
NHLRC4
WDR76
LCE1C
FCAMR
SULT2B1
ZC2HC1B
FAM230B
FAM230A
SERPING1
MAML3
TSPYL6
TCL6
LOC442497
TPH2
PRDM12
RPS4Y1
HIPK1-AS1
FAM124A
ALX4
KATNBL1P6
BARD1
STARD13
LOC101929534
LOC284009
ST13
KIR2DS4
SLC16A12
SNORD116-11
KLF3-AS1
NFATC2
CDC6
GPR137C
ZFAT-AS1
LINC00424
REC114
DAND5
RSPH10B
PYGM
ASGR1
ADAMTSL1
RNF157
ANKRD30BP2
CSRP1
TCTN3
DNAJC9-AS1
ADAMTS7P1
ZNF367
GLYCTK-AS1
BRD2
FCRL2
SERPINB2
FCRL5
TTC3P1
FCER2
CHIAP2
GJD3
LOC100240735
PLIN4
CACNA1C-IT2
PRR23C
LOC101927389
ASIP
LOC102723389
HOXD11
OR1M1
MS4A6E
APOL6
FZD10-AS1
SCARNA23
HOXB-AS3
PRSS35
C16ORF82
LOC100130027
HMGA1P7
LINC00622
DGKG
RTKN2
RIMS1
RAB44
CDH2
MAGI1-AS1
LINC01349
KRTAP3-2
PLXNC1
PHLDA1
SSX3
CD177
CSGALNACT1
TMEM178B
TMEM178A
DIO1
DIO2
DIO3
FRMD4A
TRAIP
DISP1
ADAM2
C6ORF132
ADAM5
GRAPL
RHCG
LINC01335
AOAH-IT1
CSH1
CT45A5
ERICH3-AS1
PHF21B
AK9
ORC6
NAALADL2-AS3
CLCA1
LOC100130691
ZNF546
LINC01127
LINC01120
SEC16B
AMBP
TMEM132B
LINC01360
LINC00272
FANCA
REEP1
LINC01118
CSPG4
MIR31HG
ZNF772
WRAP53
C8ORF34
TCP10L
LINC01550
POM121L10P
CEP164
OR13H1
ADRA1A
TREM1
LOC102724612
LOC644554
LINC01309
LINC01548
CLEC1B
SPANXC
ZNF521
LINC00691
TRPC4
COL25A1
KRTAP5-6
LOC100506937
ADRA2B
ASPN
C1QL1
LOC101929398
DNAJC3
ZNF519
BHLHE40-AS1
IL3RA
PECAM1
LINC00442
EIF4E2
ASPA
LOC729732
LINC00240
LINC01572
SLC24A4
TREML5P
SEMA3E
CLEC3B
HAUS8
P2RY2
POLR2F
LINC01327
LINC01566
LINC01560
CCDC57
IRX6
APOC4
C15ORF32
LOC101929174
C1ORF147
RAD51
SNORD114-24
SH3D21
SERHL
OR8A1
TLL1
LINC00222
UMODL1
KRTAP20-3
TRAF3IP3
VIPR2
GBA3
ZNF600
LINC01060
MAPK8IP2
CPT1B
MRPS18C
MIR181A1HG
C3ORF20
MAGEB5
CASZ1
SMIM5
HEPACAM
ARX
ATP13A5-AS1
C2ORF27A
NUAK1
PRAMEF12
LCN12
NHLH1
OTOG
FUT8-AS1
FMO9P
CDT1
IGFL3
IFNLR1
GDF3
TYR
SNAP91
SNORD126
FAM66E
SPRR1A
ZCCHC12
IFNA7
LINC01276
RDH8
ZBTB8OS
FLJ38576
EPB41L4B
CCKAR
PCF11
FFAR3
PWRN2
CBR1
LRRIQ3
GFRA1
OTOR
MTSS1
GFRA4
OR10Z1
CLDN10
CLDN14
CEACAM4
LOC102546299
LINC01018
FMO6P
LINC01016
SPRR4
LOC101927942
AMER3
LINC01056
TNXB
ADH1A
ALOX12B
LOC100129617
LYZL2
DCST1
LILRA3
CST6
LILRA5
CD99P1
C10ORF90
DISC1
CORIN
LAIR1
GINS1
LOC101927711
CACNA1C-AS4
LINC01288
LHFPL1
OR10X1
LBX2
OR4A5
KBTBD8
PCGEM1
APOOP5
GALNT15
CCL4L2
GALNT18
LGALS8-AS1
NPY2R
TTTY3
LOC151760
DISC1FP1
OR2T12
CNDP1
SVEP1
STARD4-AS1
MKRN2OS
LOC101927975
KRTAP13-4
AMY1C
LIFR
PRSS57
COL4A6
OR52E6
ADCY10P1
LOC101928832
OR2C1
AKNA
CHRNA6
CSNK1A1P1
PSG11
NALCN
LOC645188
SCIN
MAN2A2
PODXL
OR7E19P
NLRP2
USP51
ST3GAL5-AS1
FAM83B
PDZD7
SPECC1
STIL
TGFB2
LRP1B
NR4A2
DIAPH3
FAM187B
XAGE2
COPE
MYF5
HAPLN4
OR8U1
HAPLN1
TMEM100
SLC7A11-AS1
HK3
NETO1
OBP2B
KYNU
MCF2L
SIX3
TMEM108
LOC100131289
TAS2R4
PCDHGA8
DCD
OR2H2
URAD
ARAP2
IQCC
LOC283299
UBTFL1
RBL1
IFNE
CDH10
ALDH1A1
AKNAD1
LOC101929719
MYH7
RGS18
COLEC12
COLEC11
PDXK
NRXN1
LIN9
IWS1
ELOVL2-AS1
ERICH6
NXF2
AFG3L1P
IFNL1
NOTO
MUC7
FAM87A
NXF5
HES2
PHOSPHO2-KLHL23
OOSP1
TICRR
RNASEH2B-AS1
G6PD
CYB5R3
ANGPTL3
APOC3
NR1H3
ABCG1
NPC1L1
APOA4
SOAT1
SOAT2
APOA2
FDPS
APOC1
EBP
ACOX2
CYP2R1
CYP11A1
CH25H
STARD3
LIPG
APOC2
APOM
APOF
OSBPL5
PPARB
TSPO
CYP46A1
MSR1
ABCA5
AKR1C1
SEC14L2
EHD1
ABCA2
LDLRAP1
LRP1
HSD17B4
INSIG2
STAR
DHCR24
SREBF1
MVK
HMGCS2
CAT
TRERF1
CD36
MYLIP
EBPL
MALL
NR5A2
PMVK
TM7SF2
ACAA2
OSBPL1A
STX12
PNLIP
IDI2
PCTP
IDI1
TMEM97
HDLBP
PLSCR3
MBTPS2
SORL1
ABCG4
HMGCS1
SNX17
TSPO2
APOL2
FDXR
LSS
MVD
MBTPS1
CNBP
LIPE
NSDHL
CELA3A
GPIHBP1
FABP4
SCARF1
CLN6
TNFSF4
APOL1
NCEH1
ALMS1
CD24
PRKAA2
PRKAA1
VPS4B
CUBN
VLDLR
CST9
CLN8
IHH
PARM1
CAV3
CRISPLD2
ELL2
GPNMB
MPV17
HFE
COL18A1
IL31RA
CREBBP
ANG
NOG
SMAD1
TP63
SLC23A2
