# Supplementary material for: Salidroside alleviates cholestasis-induced liver fibrosis by inhibiting hepatic stellate cells via activation of the PI3K/AKT/GSK-3β signaling pathway and regulating intestinal flora distribution
Source: Front Pharmacol. 2024 May 14;15:1396023. doi: 10.3389/fphar.2024.1396023 (PMC11130389; doi:10.3389/fphar.2024.1396023)
Supplement: Supplementary file 4 [file DataSheet2.xlsx]

## Sheet: Sheet1
Target
VEGFA
FGF1
FGF2
HPSE
CDA
PNP
AHCY
ADORA1
ADORA2A
PSEN2
PSENEN
NCSTN
APH1A
PSEN1
APH1B
TYMS
ADK
ADA
CDK9
CCNT1
CSNK2A1
TK1
OGA
KDM4E
PTGES
PTPN2
HEXA
HEXB
LGALS4
LGALS8
DAO
MAPK1
PIM1
GAPDH
DPP4
GAA
HSPA5
ADORA3
KDM4C
HSP90AA1
CDK2
CCNA1
CCNA2
PIN1
STAT3
CDK1
HDAC1
PYGM
HSPA8
FOLH1
EGFR
ESR2
AKR1C3
AKR1B1
TNF
IL2
CA7
CA12
XDH
RPS6KA3
ACHE
NMUR2
ADRA2A
ALOX5
CD38
PDE5A
ALDH2
CA2
CA4
NQO2
SLC29A1
NOX4
ADRA2C
F10
ESRRG
GABRA1
GABRB2
GABRG2
PTGS1
AR
GABRB3
SHBG
GABBR1
GABBR2
PTGS2
TYR
CA1
CA3
CA14
CA9
CA5A
CA6
FUT7
CA5B
CA13
SQLE
LDHA
LDHB
TTR
IGF1R
ALK
SERPINE1
BCL2L1
GPR35
COMT
TPMT
CYP19A1
CYP17A1
HSD11B1
POLA1
NOS2
PTPN1
GSK3B
NR1H3
NR1H2
HMGCR
NPC1L1
SRD5A2
HSD11B2
ALOX5AP
PGR
FAAH
TTL
AKR1C1
OPRD1
HRH3
HRH4
KDR
FASN
TEK
NR1H4
ROCK2
CDK5
CDK5R1
F2R
P2RY1
OPRK1
MCL1
CXCR3
BCL2
NR3C1
FABP4
PPARA
FABP3
FABP5
PPARD
FFAR1
FABP2
SLC22A6
VDR
GPBAR1
AKR1B10
CDC25A
KDM2A
PHF8
KDM5C
UGT2B7
SERPINA6
HSD17B3
G6PD
PTGER2
PTGFR
FNTA
FNTB
GABRA2
POLB
HAO1
PLG
GSTK1
LTA4H
CDC45
PTPRC
CACNA2D1
CHRNA7
SAE1
UBA2
GRM5
FDFT1
TRPM8
ESR1
NR1I3
SHH
CDC25B
PPARG
TERT
FABP1
RARG
RARB
RARA
GLRA1
NR0B2
CYP26B1
CYP26A1
SCD
RXRB
RXRG
RXRA
PTGER4
GCG
PDE4A
PDE4B
MIF
MMP9
MMP1
MMP2
TLR4
KDM4A
KDM3A
KDM6B
FTO
F3
HCAR2
TRPA1
FYN
LCK
NGFR
TDP1
P2RX3
SLC5A2
SLC5A1
SLC5A4
MMP13
MMP7
MMP8
TYMP
IGFBP3
PYGL
HRAS
F2
HK2
HK1
PFKFB3
GBA
MANBA
FUCA1
SLC6A2
GRK1
CCNB1
CDK4
CCND1
IDO1
MMP3
ADAM17
LGALS3
LGALS9
ADORA2B
SSTR5
SSTR2
SSTR4
SSTR1
SSTR3
MAG
VARS
LARS
EIF4H
PABPC1
IMPDH1
IMPDH2
NAALAD2
MGMT
MME
ECE1
GGH
CASP3
CASP6
CASP7
CASP8
CASP2
ABCG2
ABCB1
CYP1B1
APP
BACE1
AKT1
MAPT
TOP2A
INSR
MYLK
PIK3CG
APEX1
KIT
HSD17B2
ALOX15
ALOX12
OPRM1
FLT3
PKN1
CAMK2B
AXL
MAOA
AVPR2
CXCR1
ABCC1
MET
DRD4
CCNB3
CCNB2
HSD17B1
CDK6
BCHE
ST6GAL1
AURKB
SRC
PTK2
PLK1
NEK2
NEK6
NUAK1
ODC1
PLA2G2A
DAPK1
GLO1
MPO
PIK3R1
PLA2G1B
AKR1C2
AKR1C4
AKR1A1
SYK
SLC22A12
ARG1
PARP1
MMP12
TNKS2
TNKS
TOP1
PTPRS
CFTR
AMY1A
GRK6
SIRT1
NAE1
SIGMAR1
CBR1
MPG
AHR
ESRRA
INMT
ABAT
EGLN1
HDAC3
ACLY
PYGB
HTR2B
ADRA2B
DRD1
DRD2
ADRA1D
HTR2A
HTR2C
DRD3
CYP2D6
HTR6
ADRA1A
HTR1B
RORC
TRPV1
PTAFR
GLRA2
PPM1A
MGAM
SI
NEU3
NEU2
NEU4
MLNR
KCNH2
TAS2R31
FGFR1
KLK1
KLK2
CES1
MAOB
PLA2G5
PLA2G10
MMP14
CES2
PIK3CA
HIF1A
PGF
MTOR
CHEK1
WEE1
RET
EDNRA
DNMT1
PGD
ST3GAL3
FUT4
STAT1
ALPL
ADAM10
FCER2
PDK1
EIF2AK3
EIF4A1
CRHR1
MT-ND4
MAPK3
PIK3C2A
PIK3C2G
PIP4K2C
RAF1
RELA
PRKCB
PRKCG
DUSP3
SPHK2
SPHK1
ADAMTS5
ERN1
MAPKAPK2
CSNK1G1
RPS6KA1
ROCK1
CCNE1
GUSB
MAPK8
NQO1
SGK1
PLAA
LIPC
LIPG
BRAF
NTRK1
AURKA
CNR1
CNR2
CYP51A1
SLC6A3
EPHX2
PPM1B
PPP2R5A
ATP1A1
TACR2
GPR55
MAPK14
CSNK1D
GRB2
ERBB2
CHRM1
ABL1
EPHA2
MAP3K9
BTK
KDM5B
KDM4D
AGTR1
ITGA4
ITGB1
GSTP1
GSTM2
RNASEH1
HPRT1
PRKCA
PRKCZ
PRKACA
